# Supplementary material for: Electrospun Polyacrylonitrile Nanofibrous Membranes for Point‐of‐Use Water and Air Cleaning
Source: PubMed Central journal article supplement — ChemistryOpen. 2019 Jan 24;8(1):97–103. doi: 10.1002/open.201800267 (PMC6345220; doi:10.1002/open.201800267), 2019-01-24
Supplement: OPEN-8-97-s001.pdf [file OPEN-8-97-s001.pdf]

## **Author Contributions**

R.R. Data curation:Equal; Formal analysis:Equal; Methodology:Equal; Validation:Equal; Visualization:Equal
